# Supplementary material
Source: PubMed Central journal article supplement (PMC9976613)
Supplement: NIHMS1873288-supplement-1.pdf [file NIHMS1873288-supplement-1.pdf]

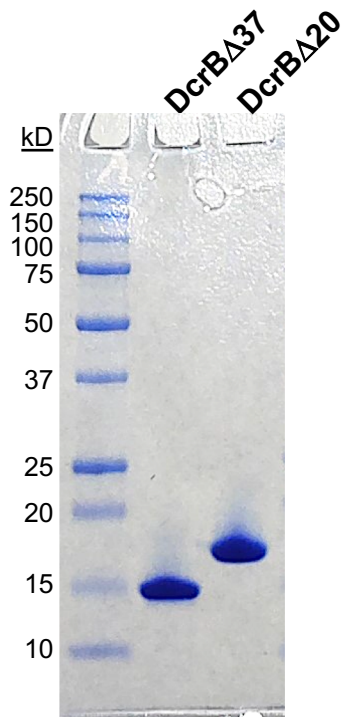

**Supplementary Figure 2.** Analysis of 20  $\mu\text{g}$  of purified DcrB $\Delta$ 20 (18.6 kD) or 20  $\mu\text{g}$  of DcrB $\Delta$ 37 (16.9 kD) by SDS-polyacrylamide gel electrophoresis followed by Coomassie staining.

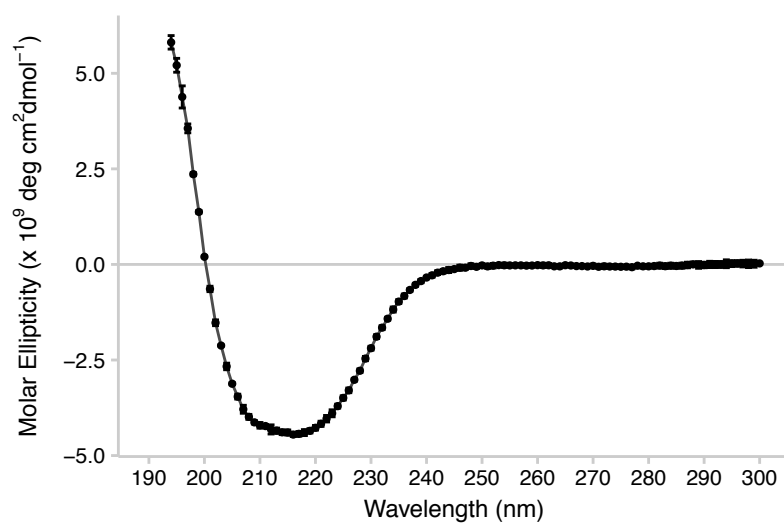

**Supplementary Figure 3.** DcrB consists primarily of  $\beta$ -sheet in solution. Molar ellipticity values from a circular dichroism wavelength scan of DcrB $\Delta$ 37 are plotted as the mean of 3 independent experiments, and error bars represent standard deviations.

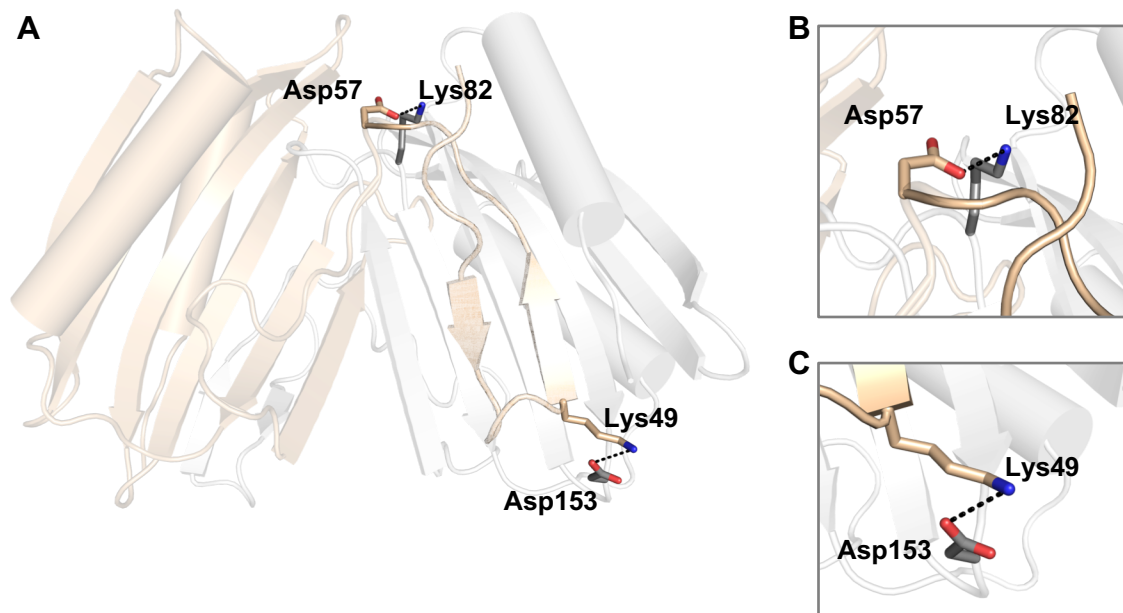

**Supplementary Figure 4.** Salt bridge interactions in the domain-swapped dimer of DcrB $\Delta$ 37. A) The two salt bridges are depicted between the  $\beta$ -hairpin of one DcrB $\Delta$ 37 monomer (wheat) and the other DcrB $\Delta$ 37 monomer (light gray). The side chains of residues involved in these salt bridges are depicted as sticks, with oxygen atoms in red, nitrogen atoms in blue, and carbon atoms in either wheat (one monomer) or gray (second monomer). B) Zoomed views of the Asp57–Lys82 salt bridge (B) and Lys49–Asp153 salt bridge (C), colored the same as described in panel A. The black dashed line indicates the electrostatic interaction between the side chains.

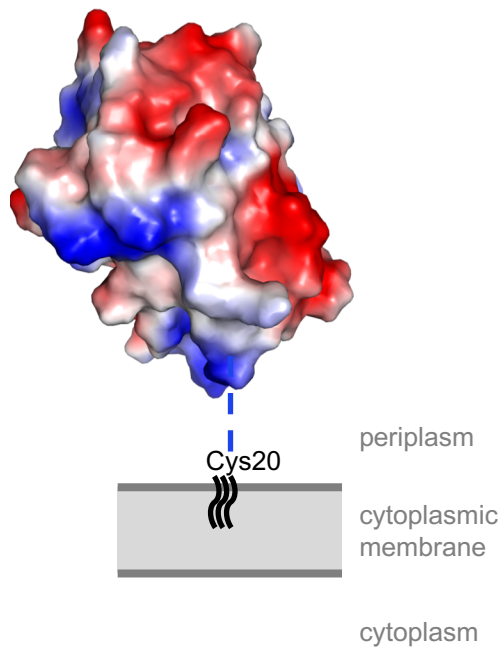

**Supplementary Figure 5.** Predicted electrostatic charge of DcrB relative to the cytoplasmic membrane. The DcrB monomer is colored based on the calculated surface electrostatic charge, where red represents regions of negative charge and blue represents regions of positive charge. The dotted lines represent the unstructured region, corresponding to amino acids 21–37, that connect the lipid-modified Cys20 to the structured domain of DcrB.

**Supplementary Table 1.** Oligonucleotide primers used in this study

| Primer name   | Sequence (5' to 3')                                     |
|---------------|---------------------------------------------------------|
| JM012         | TATACATATGCATCATCATCATCATGCAGATAACAACGATACAAA<br>GC     |
| JM013         | CCCAAGCTTACTTAATAACCAACGTATTGATGATGTTTTCAGCCGTGG<br>TTT |
| T7-promoter   | TAATACGACTCACTATAGGG                                    |
| T7-terminator | GCTAGTTATTGCTCAGCGG                                     |

**Supplementary Table 2.** Bacterial strains and plasmids used in this study

| Strain or plasmid                                | Description                                                                                                                                                                                                                     | Reference or Source            |
|--------------------------------------------------|---------------------------------------------------------------------------------------------------------------------------------------------------------------------------------------------------------------------------------|--------------------------------|
| <i>Salmonella enterica</i>                       |                                                                                                                                                                                                                                 |                                |
| 14028s                                           | wild-type                                                                                                                                                                                                                       | (Fields et al., 1986)          |
| <i>Escherichia coli</i>                          |                                                                                                                                                                                                                                 |                                |
| DH5 $\alpha$                                     | F <sup>-</sup> - <i>supE44</i> $\Delta$ <i>lacU169</i> ( $\phi$ 80 <i>lacZ</i> $\Delta$ M15) <i>hsdR17 recA1 endA1 gyrA96 thi-1 relA1</i>                                                                                       | (Hanahan, 1983)                |
| C41(DE3)                                         | F <sup>-</sup> <i>ompT hsdSB (rB<sup>-</sup> mB<sup>-</sup>) gal dcm</i> ( $\lambda$ DE3)<br>$\lambda$ DE3 = $\lambda$ <i>sBamHlo</i> $\Delta$ <i>EcoRI-B</i><br><i>int::(lacI::PlacUV5::T7 gene1) i21</i> $\Delta$ <i>nin5</i> | Lucigen                        |
| JW0374-1                                         | F <sup>-</sup> , $\Delta$ ( <i>araD-araB</i> )567, $\Delta$ <i>lacZ4787</i> (::rrnB-3), $\Delta$ <i>phoA748::kan</i> , $\lambda^-$ , <i>rph-1</i> , $\Delta$ ( <i>rhaD-rhaB</i> )568, <i>hsdR514</i>                            | Yale Coli Genetic Stock Center |
| JM273                                            | C41(DE3) $\Delta$ <i>phoA748::kan</i>                                                                                                                                                                                           | This work                      |
| JM280                                            | C41(DE3) $\Delta$ <i>phoA748::kan</i><br>/ pET-22b-His <sub>6</sub> <i>dcrB</i> $\Delta$ 20                                                                                                                                     | This work                      |
| JM296                                            | C41(DE3) $\Delta$ <i>phoA748::kan</i><br>/ pET-22b-His <sub>6</sub> <i>dcrB</i> $\Delta$ 37                                                                                                                                     |                                |
| <b>Plasmids</b>                                  |                                                                                                                                                                                                                                 |                                |
| pBR322                                           | rep <sub>pMB1</sub> Amp <sup>R</sup> Tet <sup>R</sup>                                                                                                                                                                           | New England Biolabs            |
| pBR322- <i>dcrB</i>                              | rep <sub>pMB1</sub> Amp <sup>R</sup> Tet <sup>S</sup>                                                                                                                                                                           | This work                      |
| pET-22b(+)                                       | rep <sub>pMB1</sub> Amp <sup>R</sup> <i>lacI</i> P <sub>T7</sub>                                                                                                                                                                | Novagen                        |
| pET-22b-His <sub>6</sub> <i>dcrB</i> $\Delta$ 20 | rep <sub>pMB1</sub> Amp <sup>R</sup> <i>lacI</i> P <sub>T7</sub> -His <sub>6</sub> - <i>dcrB</i> $\Delta$ 20                                                                                                                    | This work                      |
| pET-22b-His <sub>6</sub> <i>dcrB</i> $\Delta$ 37 | rep <sub>pMB1</sub> Amp <sup>R</sup> <i>lacI</i> P <sub>T7</sub> -His <sub>6</sub> - <i>dcrB</i> $\Delta$ 37                                                                                                                    | This work, Genscript           |

**Supplementary Table 3.** X-ray diffraction data collection statistics for SeMet DcrB $\Delta$ 20

| SeMet DcrB $\Delta$ 20                    |                        |
|-------------------------------------------|------------------------|
| <b>Data Collection</b>                    |                        |
| Beamline                                  | 21-ID-D, LS-CAT, APS   |
| Wavelength, Å                             | 0.97895                |
| Resolution range (high resolution bin), Å | 95.71–2.30 (2.33–2.30) |
| Space Group                               | P 21 21 2              |
| Unit Cell (a, b, c (Å))                   | 82.44, 191.41, 41.06   |
| ( $\alpha$ , $\beta$ , $\gamma$ (°))      | 90, 90, 90             |
| Completeness, %                           | 98.6 (92.0)            |
| Total Reflections                         | 263,245 (11,921)       |
| Unique Reflections                        | 29,643 (1,350)         |
| Redundancy                                | 8.9 (8.8)              |
| $\langle I/\sigma \rangle$                | 11.5 (4.5)             |
| $R_{\text{merge}}^{\dagger}$ , %          | 16.4 (77.7)            |
| <b>Phasing</b>                            |                        |
| Figure of Merit                           | 0.4358                 |

<sup>†</sup>  $R_{\text{merge}} = \frac{\sum_j |I_j - \langle I \rangle| \sum I_j}{\sum I_j}$ , where  $I_j$  is the intensity measurement for reflection  $j$  and  $\langle I \rangle$  is the mean intensity for multiply recorded reflections.



**Supplementary Table 4.** Determination of solution molecular weight (MW) of DcrB $\Delta$ 20 by size-exclusion chromatography multi-angle light scattering<sup>1</sup>

| <b>Protein concentration</b> | <b>SEC-MALS MW (kD)</b> | <b>Range of SEC-MALS MW across eluted peak (kD)</b> | <b>Calculated monomeric MW</b> | <b>Mono-disperse peak</b> |
|------------------------------|-------------------------|-----------------------------------------------------|--------------------------------|---------------------------|
| 1.3 mg/mL                    | 19 $\pm$ 1              | 18.5-21.0                                           | 18.6 kD                        | Yes                       |

<sup>1</sup>This analysis was carried out by the W.M. Keck Foundation Biotechnology Resource Laboratory at Yale University.

### Supplementary References

- Chenna, R., Sugawara, H., Koike, T., Lopez, R., Gibson, T.J., Higgins, D.G., Thompson, J.D., 2003. Multiple sequence alignment with the Clustal series of programs. *Nucleic Acids Res.* 31, 3497–500.
- Fields, P.I., Swanson, R. V, Haidaris, C.G., Heffron, F., 1986. Mutants of *Salmonella typhimurium* that cannot survive within the macrophage are avirulent. *Proc. Natl. Acad. Sci.* 83, 5189–5193. <https://doi.org/10.1073/pnas.83.14.5189>
- Hanahan, D., 1983. Studies on transformation of *Escherichia coli* with plasmids. *J. Mol. Biol.* 166, 557–580. [https://doi.org/10.1016/S0022-2836\(83\)80284-8](https://doi.org/10.1016/S0022-2836(83)80284-8)
